# Supplementary figures and images for: A fluidic device to study directional angiogenesis in complex tissue and organ culture models
Source: Royal Society of Chemistry journal article supplement (doi:10.1039/b814691h), 2008-12-04

Supplemental figure 1, Barkefors et al.

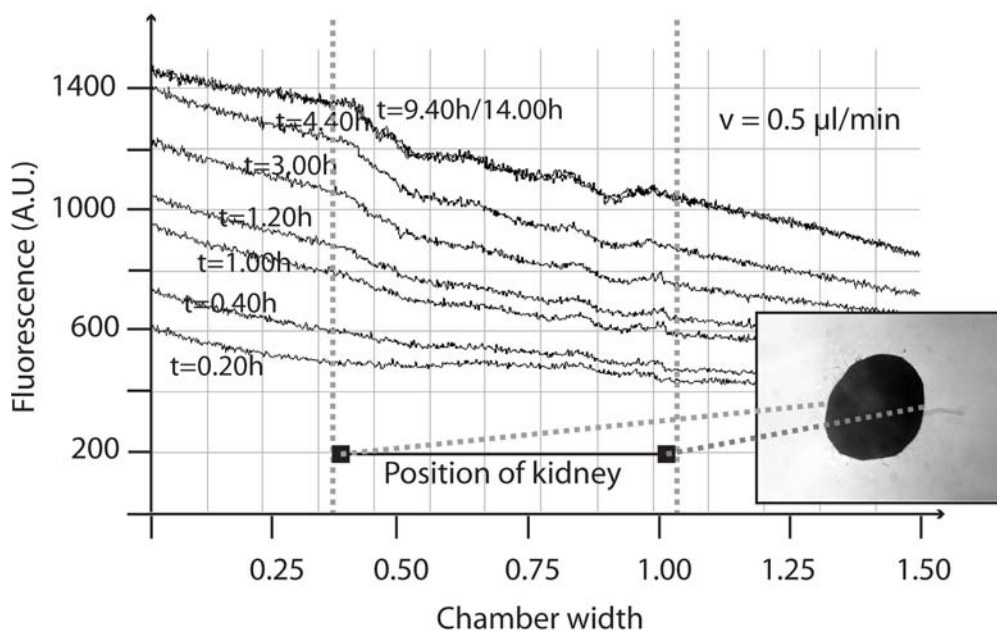

Supplemental figure 2, Barkefors et al.

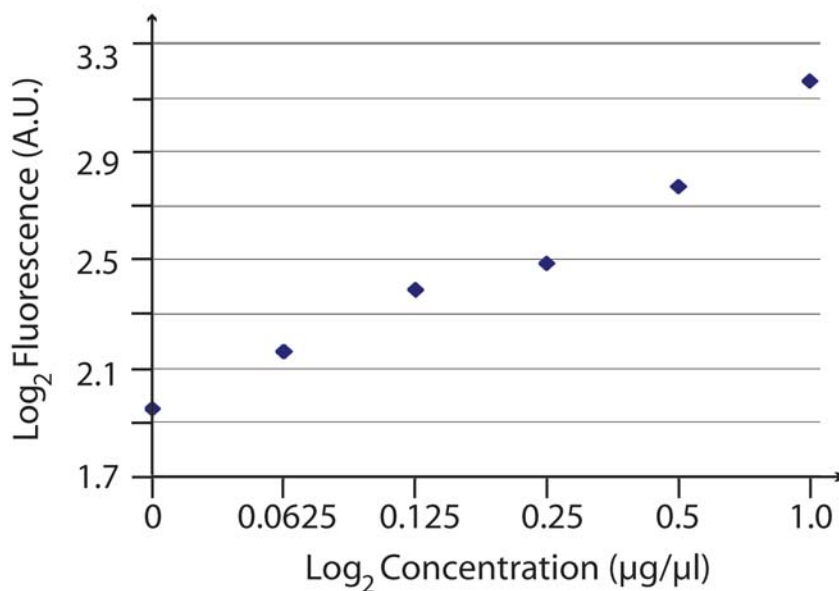

Supplement: b814691h.pdf [file b814691h.pdf]
